# Supplementary material
Source: ML conference proceedings conference paper supplement (https://proceedings.mlr.press/v48/malherbe16.html)
Supplement: Supplementary file 1 [file malherbe16-supp.pdf]

## A. Proofs of Section 2

**Proof of proposition 1.** (RANKING EQUIVALENCE) Let  $h \in \mathcal{C}^0(\mathcal{X}, \mathbb{R})$  be any continuous function defined on  $\mathcal{X}$  and taking values in  $\mathbb{R}$  and let  $f : \mathcal{X} \rightarrow \mathbb{R}$  be any function defined on  $\mathcal{X}$  and taking values in  $\mathbb{R}$ .

( $\Leftarrow$ ) Assume that there exists a strictly increasing function  $\psi : \mathbb{R} \rightarrow \mathbb{R}$  such that  $h = \psi \circ f$ . Pick any  $(x, x') \in \mathcal{X}^2$  and let  $\text{sgn} : \mathbb{R} \rightarrow \{-1, 0, 1\}$  be the standard sign function defined by  $\text{sgn}(x) = \mathbb{1}\{x > 0\} - \mathbb{1}\{x < 0\}$ . Using the fact that  $h = \psi \circ f$  where  $\psi$  is a strictly increasing function directly gives that,

$$r_h(x, x') = \text{sgn}(\psi \circ f(x) - \psi \circ f(x')) = \text{sgn}(f(x) - f(x')) = r_f(x, x').$$

( $\Rightarrow$ ) Assume that  $r_f(x, x') = r_h(x, x')$  for all  $(x, x') \in \mathcal{X}^2$ . First case: if  $r_f(x, x') = r_h(x, x') = 0$  for all  $(x, x') \in \mathcal{X}^2$ ,  $f = c$  and  $h = c'$  are constant over  $\mathcal{X}$  and therefore  $h = \psi \circ f$  where  $\psi : x \mapsto x + (c' - c)$  is a strictly increasing function. Second case: assume that  $h$  is not a constant function and introduce the function  $M : \mathcal{X} \rightarrow [0, 1]$  defined by

$$M(x) = \int_{x' \in \mathcal{X}} \mathbb{1}\{r_f(x, x') < 0\} dx' = \mu(\{x' \in \mathcal{X} : f(x') < f(x)\}).$$

We start to show that there exists a strictly increasing function  $\psi : \mathbb{R} \rightarrow \mathbb{R}$  such that  $f = \psi \circ M$ . To properly define this function, we first show (by contradiction) that for any pair of points  $(x_1, x_2) \in \mathcal{X}^2$  satisfying  $M(x_1) = M(x_2)$  necessarily  $f(x_1) = f(x_2)$ . Let  $(x_1, x_2) \in \mathcal{X}^2$  be a pair of points satisfying  $M(x_1) = M(x_2)$  and assume that  $f(x_1) < f(x_2)$ . The equality of the rankings implies that (i)  $h(x_1) < h(x_2)$ , (ii)  $M(x_1) = \mu(\{x : h(x) < h(x_1)\})$  and (iii)  $M(x_2) = \mu(\{x : h(x) < h(x_2)\})$ . Putting (i), (ii) and (iii) altogether and using the continuity of the function  $h$  leads to the next contradiction:

$$M(x_1) = \mu(\{x \in \mathcal{X} : h(x) < h(x_1)\}) < \mu(\{x \in \mathcal{X} : h(x) < h(x_2)\}) = M(x_2).$$

Assuming that  $f(x_2) < f(x_1)$  leads to a similar contradiction. We deduce that for any  $(x_1, x_2) \in \mathcal{X}^2$  satisfying  $M(x_1) = M(x_2)$ , necessarily  $f(x_1) = f(x_2)$ . As a direct consequence, for any  $y \in \text{Im}(M)$ , the function  $f$  is constant over the iso level set  $M^{-1}(y) = \{x \in \mathcal{X} : M(x) = y\}$  of the function  $M$ . We are now ready to introduce the function  $\bar{\psi} : \text{Im}(M) \rightarrow \mathbb{R}$  defined by,

$$\bar{\psi} : y \mapsto f(x) \text{ where } x \in M^{-1}(y).$$

Now, note that for any  $x \in \mathcal{X}$  we have that  $\bar{\psi}(M(x)) = f(x)$ . Using the same statement gives us that  $\bar{\psi}(y_1) < \bar{\psi}(y_2)$  for any  $y_1 < y_2 \in \text{Im}(M)$ . Therefore,  $f = \psi \circ M$  where  $\psi : \mathbb{R} \rightarrow \mathbb{R}$  is any strictly increasing extension of the function  $\bar{\psi} : \text{Im}(M) \rightarrow \mathbb{R}$  over  $\mathbb{R}$ . Reproducing the same steps with the function  $h$  gives us that there exists a strictly increasing function  $\psi' : \mathbb{R} \rightarrow \mathbb{R}$  such that  $h = \psi' \circ M$ . Combining those results, we finally get that  $h = \psi' \circ M = (\psi' \circ \psi^{-1}) \circ f$  where  $(\psi' \circ \psi^{-1})$  is a strictly increasing function.  $\square$

## B. Proofs of Section 3

In the first subsection, we recall the main definitions and provide some technical lemmas that will be used to prove the main statements presented in the second subsection.

### B.1. RankOpt process, PAS process and technical lemmas

**Definition 5.** (RANKOPT PROCESS) Let  $\mathcal{X} \subset \mathbb{R}^d$  be any compact and convex set, let  $\mathcal{R} \subseteq \mathcal{R}_\infty$  be any set of rankings and let  $f : \mathcal{X} \rightarrow \mathbb{R}$  be any function such that  $r_f \in \mathcal{R}$ . The sequence  $\{X_i\}_{i=1}^n$  is distributed as a RANKOPT process if the sequence has the same distribution as the process defined by:

$$\begin{cases} X_1 \sim \mathcal{U}(\mathcal{X}) \\ X_{t+1} | \{X_i\}_{i=1}^t \sim \mathcal{U}(\mathcal{X}_t) \quad \forall t \in \{1 \dots n-1\} \end{cases}$$

where  $\mathcal{X}_t = \{x \in \mathcal{X} : \exists r \in \mathcal{R}_t, r(x, X_{i_t}) \geq 0\}$  denotes the sampling area of the RANKOPT algorithm at iteration  $t+1$ ,  $\mathcal{R}_t = \{r \in \mathcal{R} : L_t(r) = 0\}$  denotes the set of rankings that are still consistent with the sample and  $i_t \in \arg \max_{i=1 \dots t} f(X_i)$  denotes the index of the best value observed so far.

**Lemma 1.** *Using the same notations and assumptions as in Definition 5, for all  $t \in \{1 \dots n\}$ , we have that*

$$\mathcal{X}_{f(X_{i_t})} \subseteq \mathcal{X}_t \subseteq \mathcal{X},$$

where  $\mathcal{X}_t$  denotes the sampling area of the RANKOPT process after  $t$  iterations (see Definition 5) and  $\mathcal{X}_{f(X_{i_t})} = \{x \in \mathcal{X} : f(x) \geq f(X_{i_t})\}$  denotes the level set of the best value observed so far.

*Proof.* Noticing that  $\mathcal{X}_t$  is a subset of  $\mathcal{X}$  gives the first inclusion. We now state the second inclusion. Since the true ranking  $r_f$  always perfectly ranks the sample, we have that  $r_f \in \{r \in \mathcal{R} : L_t(r) = 0\} = \mathcal{R}_t$  for any  $t \in \{1 \dots n\}$ . Now, pick any  $x \in \{x \in \mathcal{X} : f(x) \geq f(X_{i_t})\}$ . Using the definition of the true ranking  $r_f$ , we get that  $r_f(x, X_{i_t}) = \text{sgn}(f(x) - f(X_{i_t})) \geq 0$ . Therefore, there exists  $r = r_f \in \mathcal{R}_t$  such that  $r(x, X_{i_t}) \geq 0$  and we deduce that  $\{x \in \mathcal{X} : f(x) \geq f(X_{i_t})\} \subseteq \{x \in \mathcal{X} : \exists r \in \mathcal{R}_t \text{ s.t. } r(x, X_{i_t}) \geq 0\}$ .  $\square$

**Definition 6.** (PURE ADAPTIVE SEARCH PROCESS (Zabinsky & Smith, 1992)). *Let  $f : \mathcal{X} \rightarrow \mathbb{R}$  be any function such that  $r_f \in \mathcal{R}$ . The sequence  $\{X_i^*\}_{i=1}^n$  is distributed as a PURE ADAPTIVE SEARCH (PAS) process if the sequence has the same distribution as the Markov process defined by:*

$$\begin{cases} X_1^* \sim \mathcal{U}(\mathcal{X}) \\ X_{t+1}^* | X_t^* \sim \mathcal{U}(\mathcal{X}_t^*) \text{ for } t \in \{1 \dots n-1\}, \end{cases}$$

where  $\mathcal{X}_t^* = \{x \in \mathcal{X} : f(x) \geq f(X_t^*)\}$  denotes the sampling area of the PAS process (which is also the level set of the best value observed so far).

**Lemma 2.** *Let  $\{X_i^*\}_{i=1}^n$  be a sequence of  $n$  random variables distributed as the PAS process (Definition 6). Then, for any  $n \in \mathbb{N}^*$ , we have that,*

$$\mathbb{P}\left(\frac{\mu(\mathcal{X}_n^*)}{\mu(\mathcal{X})} \leq u\right) \leq \mathbb{P}\left(\prod_{i=1}^n U_i \leq u\right), \quad \forall u \in [0, 1],$$

where  $\mathcal{X}_n^* = \{x \in \mathcal{X} : f(x) \geq f(X_n^*)\}$  denotes the sampling area of the PAS process after  $n$  iterations and  $\{U_i\}_{i=1}^n$  is a sequence of  $n$  independent copies of  $U \sim \mathcal{U}([0, 1])$ .

*Proof.* The lemma is proved by induction. We start to set some notations. For any  $u \in [0, 1]$ , define  $\bar{u} = \min\{u' \in \text{Im}(f) : \mu(\mathcal{X}_{u'}) \leq u \cdot \mu(\mathcal{X})\}$  and let  $\mathcal{X}_{\bar{u}} = \{x \in \mathcal{X} : f(x) \geq \bar{u}\}$  be the corresponding level set. By definition, we have that  $\mu(\mathcal{X}_{\bar{u}}) \leq u \cdot \mu(\mathcal{X})$ . We are now ready to prove the statement.

•( $n = 1$ ) Fix any  $u \in [0, 1]$  and let  $n = 1$ . Since  $X_1^* \sim \mathcal{U}(\mathcal{X})$ , we have that,

$$\mathbb{P}\left(\frac{\mu(\mathcal{X}_1^*)}{\mu(\mathcal{X})} \leq u\right) = \mathbb{P}(X_1^* \in \mathcal{X}_{\bar{u}}) = \frac{\mu(\mathcal{X}_{\bar{u}})}{\mu(\mathcal{X})} \leq u.$$

Now, let  $U_1 \sim \mathcal{U}([0, 1])$  be a random variable uniformly distributed over  $[0, 1]$ . By definition, we have that  $u = \mathbb{P}(U_1 \leq u)$ , therefore the result holds for  $n = 1$ .

•(Induction) Assume that the statement holds for a fixed  $n \in \mathbb{N}^*$  and fix any  $u \in [0, 1]$ . Conditioning on  $X_n^*$  and using the fact that  $X_{n+1}^* | X_n^* \sim \mathcal{U}(\mathcal{X}_n^*)$  (Definition 6) gives us that,

$$\mathbb{P}\left(\frac{\mu(\mathcal{X}_{n+1}^*)}{\mu(\mathcal{X})} \leq u\right) = \mathbb{E}[\mathbb{P}(X_{n+1}^* \in \mathcal{X}_{\bar{u}} | X_n^*)] = \mathbb{E}\left[\frac{\mu(\mathcal{X}_{\bar{u}} \cap \mathcal{X}_n^*)}{\mu(\mathcal{X}_n^*)}\right].$$

By definition and using the inclusion of the level sets, we have the following equivalences on the events,  $\{f(X_n^*) \geq \bar{u}\} = \{\mathcal{X}_n^* \subseteq \mathcal{X}_{\bar{u}}\}$  and  $\{f(X_n^*) \leq \bar{u}\} = \{\mathcal{X}_{\bar{u}} \subseteq \mathcal{X}_n^*\}$ . Therefore, using those equivalences gives us that  $\mu(\mathcal{X}_{\bar{u}} \cap \mathcal{X}_n^*) / \mu(\mathcal{X}_n^*) = \min(1, \mu(\mathcal{X}_{\bar{u}}) / \mu(\mathcal{X}_n^*))$  and so,

$$\mathbb{P}\left(\frac{\mu(\mathcal{X}_{n+1}^*)}{\mu(\mathcal{X})} \leq u\right) = \mathbb{E}\left[\min\left(1, \frac{\mu(\mathcal{X}_{\bar{u}})}{\mu(\mathcal{X}_n^*)}\right)\right].$$

Now, let  $U_{n+1} \sim \mathcal{U}([0, 1])$  be a random variable uniformly distributed over  $[0, 1]$ , independent of  $X_n^*$ . By definition, we have that  $\mathbb{P}(U_{n+1} \leq \mu(\mathcal{X}_{\bar{u}})/\mu(\mathcal{X}_n^*) | X_n^*) = \min(1, \mu(\mathcal{X}_{\bar{u}})/\mu(\mathcal{X}_n^*))$ . Therefore, using independence, we get that,

$$\mathbb{P}\left(\frac{\mu(\mathcal{X}_{n+1}^*)}{\mu(\mathcal{X})} \leq u\right) = \mathbb{E}\left[\mathbb{P}\left(U_{n+1} \leq \frac{\mu(\mathcal{X}_{\bar{u}})}{\mu(\mathcal{X}_n^*)} \mid X_n^*\right)\right] \stackrel{\text{ind.}}{=} \mathbb{P}\left(U_{n+1} \cdot \frac{\mu(\mathcal{X}_n^*)}{\mu(\mathcal{X})} \leq \frac{\mu(\mathcal{X}_{\bar{u}})}{\mu(\mathcal{X})}\right) \leq \mathbb{P}\left(U_{n+1} \cdot \frac{\mu(\mathcal{X}_n^*)}{\mu(\mathcal{X})} \leq u\right).$$

Plugging the induction assumption into the last equation and using independence gives the result.  $\square$

**Lemma 3.** *Let  $\{U_i\}_{i=1}^n$  be a sequence of  $n$  i.i.d. copies of  $U \sim \mathcal{U}([0, 1])$ . Then, for any  $\delta \in (0, 1)$ , we have that,*

$$\mathbb{P}\left(\prod_{i=1}^n U_i < \delta \cdot e^{-n - \sqrt{2n \ln(1/\delta)}}\right) < \delta.$$

*Proof.* The result is a consequence of concentration results of sub-gamma random variables. Taking the logarithm on both sides of the inequality gives us that  $\prod_{i=1}^n U_i < \delta \cdot e^{-n - \sqrt{2n \ln(1/\delta)}} \Leftrightarrow \sum_{i=1}^n -\ln(U_i) > n + \sqrt{2n \ln(1/\delta)} + \ln(1/\delta)$ . Since  $U_i \sim \mathcal{U}([0, 1])$ , we have that  $-\ln(U_i) \sim \text{Exp}(1)$  and therefore  $\sum_{i=1}^n -\ln(U_i) \sim \text{Gamma}(n, 1)$  by independence. We finally get the result by applying concentration results of sub-gamma random variables (see (Boucheron et al., 2013)).  $\square$

**Lemma 4.** *Let  $\mathcal{X} \subset \mathbb{R}^d$  be any compact and convex set, let  $f \in C^0(\mathcal{X}, \mathbb{R})$  be any continuous function that satisfies the level set assumption  $(\alpha, c_\alpha)$  and fix any  $r \in (0, \max_{x \in \mathcal{X}} \|x^* - x\|_2)$ . Then, denoting  $\mathcal{S}_r = \{x \in \mathcal{X} : \|x^* - x\|_2 = r\}$  the intersection of  $\mathcal{X}$  with the  $\ell_2$ -sphere of radius  $r$  centered around  $x^*$ , we have that,*

$$\mathcal{X} \cap B(x^*, (r/c_\alpha)^{1+\alpha}) \subseteq \{x \in \mathcal{X} : f(x) \geq \min_{x_r \in \mathcal{S}_r} f(x_r)\} \subseteq B(x^*, c_\alpha \cdot r^{1/(1+\alpha)}).$$

*Proof.* Fix any  $x_r \in \arg \min_{x \in \mathcal{S}_r} f(x)$ , fix any  $y \in [f(x_r), f(x^*)]$  and let  $f^{-1}(y) = \{x \in \mathcal{X} : f(x) = y\}$  be the corresponding iso level set. We first show that there exists  $x_y \in f^{-1}(y)$  such that  $\|x^* - x_y\| \leq r$ . Introduce the function  $F_{x_r, x^*} : [0, 1] \rightarrow \mathbb{R}$  that returns the value of the function  $f$  over the segment  $[x^*, x_r]$ , defined by,

$$F_{(x^*, x_r)} : \lambda \mapsto f((1 - \lambda)x^* + \lambda x_r).$$

The convexity of the subset  $\mathcal{X}$  and the continuity of the function  $f$  imply that the function  $F_{(x^*, x_r)}$  is well-defined and continuous. Since  $F_{(x^*, x_r)}(0) = f(x^*)$  and  $F_{(x^*, x_r)}(1) = f(x_r)$ , applying the intermediate value theorem gives us that there exists  $\lambda_y \in [0, 1]$  such that  $F_{x_r}(\lambda_y) = y$ . Therefore, there exists  $x_y = \lambda_y x^* + (1 - \lambda_y)x_r \in f^{-1}(y)$  such that  $\|x^* - x_y\|_2 \leq \|x^* - x_r\|_2 = r$ . We now show the second inclusion (by contradiction). Assume that there exist  $x'_y \in f^{-1}(y)$  such that  $\|x^* - x'_y\|_2 > c_\alpha r^{1/(1+\alpha)}$ . It implies that  $\max_{x \in f^{-1}(y)} \|x^* - x\|_2 \geq \|x^* - x'_y\|_2 > c_\alpha r^{1/(1+\alpha)}$ . On the other hand, we have that  $c_\alpha \min_{x \in f^{-1}(y)} \|x^* - x\|_2^{1/(1+\alpha)} \leq c_\alpha \|x^* - x_y\|_2^{1/(1+\alpha)} \leq c_\alpha r^{1/(1+\alpha)}$ . Combining the previous inequalities together with the level set assumption leads us to a contradiction :

$$\max_{x \in f^{-1}(y)} \|x^* - x\|_2 \leq c_\alpha \cdot \min_{x \in f^{-1}(y)} \|x^* - x\|_2^{1/(1+\alpha)} < \max_{x \in f^{-1}(y)} \|x^* - x\|_2.$$

The contradiction holds for any  $y \in [f(x_r), f(x^*)]$ . We deduce that  $\{x \in \mathcal{X} : f(x) \geq \min_{x \in \mathcal{S}_r} f(x_r)\} \subseteq B(x^*, c_\alpha \cdot r^{1/(1+\alpha)})$ .

We use similar arguments to prove the first inclusion. Assume that there exists  $x' \in \mathcal{X} \cap B(x^*, (r/c_\alpha)^{1+\alpha})$  such that  $f(x) < f(x_r)$ . Introducing the function  $F_{(x^*, x')} : \lambda \mapsto f((1 - \lambda)x^* + \lambda x')$  and reproducing the same steps as previously gives us that there exists  $x'_r \in f^{-1}(f(x_r))$  such that  $\|x^* - x'_r\|_2 < (r/c_\alpha)^{1+\alpha}$ . Hence,  $c_\alpha \cdot \min_{x \in f^{-1}(f(x_r))} \|x^* - x\|_2^{1/(1+\alpha)} \leq c_\alpha \|x^* - x'_r\|_2^{1/(1+\alpha)} < r$ . On the other hand, we have that  $\max_{x \in f^{-1}(f(x_r))} \|x^* - x\|_2 \geq \|x^* - x_r\|_2 = r$ . We get a similar contradiction and we deduce that  $\mathcal{X} \cap B(x^*, (d/c_\alpha)^{1+\alpha}) \subseteq \{x \in \mathcal{X} : f(x) \geq \min_{x_r \in \mathcal{S}_r} f(x_r)\}$ .  $\square$

**Lemma 5.** (From (Zabinsky & Smith, 1992)). Let  $\mathcal{X} \subset \mathbb{R}^d$  be any compact and convex set. Then, for any  $x^* \in \mathcal{X}$  and any  $r \in (0, \text{diam}(\mathcal{X}))$ , we have that,

$$\frac{\mu(B(x^*, r) \cap \mathcal{X})}{\mu(\mathcal{X})} \geq \left( \frac{r}{\text{diam}(\mathcal{X})} \right)^d.$$

*Proof.* Introduce the similarity transformation  $\lambda : \mathbb{R}^d \rightarrow \mathbb{R}^d$  defined by

$$\lambda : x \mapsto x^* + \frac{r}{\text{diam}(\mathcal{X})}(x - x^*)$$

Denote by  $\lambda(\mathcal{X}) = \{\lambda(x) : x \in \mathcal{X}\}$  the image of the subset  $\mathcal{X}$  after the similarity transformation. Using the convexity of  $\mathcal{X}$  and the fact that  $\max_{x \in \mathcal{X}} \|x^* - x\|_2 \leq \text{diam}(\mathcal{X})$ , we have that  $\lambda(\mathcal{X}) \subseteq B(x^*, r) \cap \mathcal{X}$ . Hence,  $\mu(B(x^*, r) \cap \mathcal{X}) \geq \mu(\lambda(\mathcal{X}))$ . Now, using the fact that  $\lambda$  is a similarity transformation and conserves the ratios of the volumes before/after transformation, we get that,

$$\frac{\mu(B(x^*, r) \cap \mathcal{X})}{\mu(\mathcal{X})} \geq \frac{\mu(\lambda(\mathcal{X}))}{\mu(\mathcal{X})} = \frac{\mu(\lambda(B(x^*, \text{diam}(\mathcal{X}))))}{\mu(B(x^*, \text{diam}(\mathcal{X})))} = \frac{\mu(B(x^*, r))}{\mu(B(x^*, \text{diam}(\mathcal{X})))}.$$

Finally, using the fact that  $\mu(B(x^*, r)) = \pi^{d/2} r^d / \Gamma(d/2 + 1)$  where  $\Gamma(\cdot)$  stands for the standard gamma function gives the result.  $\square$

## B.2. Proofs of the main results

**Proof of Proposition 2.** The statement is proved by induction. Since  $X_1 \sim \mathcal{U}(\mathcal{X})$ , the result trivially holds for  $n = 1$ . Assume that the statement holds for a fixed  $n \in \mathbb{N}^*$ . For any  $y \leq \min_{x \in \mathcal{X}} f(x)$  and any  $y \geq \max_{x \in \mathcal{X}} f(x)$ , the result also trivially holds. Now, fix any  $y \in (\min_{x \in \mathcal{X}} f(x), \max_{x \in \mathcal{X}} f(x))$ , let  $\mathcal{X}_y = \{x \in \mathcal{X} : f(x) \geq y\}$  be the corresponding level set and let  $\{X_i\}_{i=1}^{n+1}$  be a sequence distributed as the RANKOPT process (see Definition 5). Applying the Bayes rule gives us that,

$$\mathbb{P}(f(X_{n+1}) \geq y) = \mathbb{P}(\{X_{n+1} \in \mathcal{X}_y\} \bigcap_{i=1}^n \{X_i \notin \mathcal{X}_y\}) + \mathbb{P}(\bigcup_{i=1}^n \{X_i \notin \mathcal{X}_y\}). \quad (1)$$

We start to bound the first term. Conditioning on  $\{X_i\}_{i=1}^n$  and using the fact that  $X_{n+1} | \{X_i\}_{i=1}^n \sim \mathcal{U}(\mathcal{X}_n)$  (see Definition 5), we have that,

$$\mathbb{P}(\{X_{n+1} \in \mathcal{X}_y\} \bigcap_{i=1}^n \{X_i \notin \mathcal{X}_y\}) = \mathbb{E}[\mathbb{1}\{\bigcap_{i=1}^n \{X_i \notin \mathcal{X}_y\}\} \cdot \mathbb{P}(X_{n+1} \in \mathcal{X}_y | \{X_i\}_{i=1}^n)] = \mathbb{E} \left[ \mathbb{1}\{\bigcap_{i=1}^n \{X_i \notin \mathcal{X}_y\}\} \cdot \frac{\mu(\mathcal{X}_n \cap \mathcal{X}_y)}{\mu(\mathcal{X}_n)} \right]$$

On the event  $\bigcap_{i=1}^n \{X_i \notin \mathcal{X}_y\} = \{f(X_{i_n}) < y\}$ , we have that  $\{\mathcal{X}_y \subseteq \mathcal{X}_n \subseteq \mathcal{X}\}$  (see Lemma 1). Hence,

$$\mathbb{P}(\{X_{n+1} \in \mathcal{X}_y\} \bigcap_{i=1}^n \{X_i \notin \mathcal{X}_y\}) \geq \frac{\mu(\mathcal{X}_y)}{\mu(\mathcal{X})} \cdot \mathbb{E}[\mathbb{1}\{\bigcap_{i=1}^n \{X_i \notin \mathcal{X}_y\}\}]. \quad (2)$$

Plugging (2) into (1) and noticing that  $\mathbb{E}[\mathbb{1}\{\bigcap_{i=1}^n \{X_i \notin \mathcal{X}_y\}\}] = 1 - \mathbb{P}(f(X_{i_n}) \geq y)$  give us that

$$\mathbb{P}(f(X_{n+1}) \geq y) \geq \mathbb{P}(f(X_{i_n}) \geq y) + \frac{\mu(\mathcal{X}_y)}{\mu(\mathcal{X})} \cdot (1 - \mathbb{P}(f(X_{i_n}) \geq y)). \quad (3)$$

Now, let  $\{X'_i\}_{i=1}^{n+1}$  be a sequence of  $(n+1)$  i.i.d. random variables uniformly distributed over  $\mathcal{X}$ . Reproducing the same steps as previously and using the fact that  $\mathbb{P}(X'_{n+1} \in \mathcal{X}_y) = \mu(\mathcal{X}_y)/\mu(\mathcal{X})$ , we get that,

$$\mathbb{P} \left( \max_{i=1 \dots n+1} f(X'_i) \geq y \right) = \mathbb{P} \left( \max_{i=1 \dots n} f(X'_i) \geq y \right) + \frac{\mu(\mathcal{X}_y)}{\mu(\mathcal{X})} \cdot \left( 1 - \mathbb{P} \left( \max_{i=1 \dots n} f(X'_i) \geq y \right) \right). \quad (4)$$

Plugging the induction assumption into (3) and comparing the result with (4) gives us  $\mathbb{P}(f(X_{i_{n+1}}) \geq y) \leq \mathbb{P}(\max_{i=1 \dots n+1} f(X'_i) \geq y)$ .  $\square$

**Proof of Corollary 1.** (CONSISTENCY) We use the same notations and assumptions as in Definition 5 and we further assume that the maximum of the function  $f$  is identifiable. Fix any  $\varepsilon > 0$ , let  $\mathcal{X}_{f^*-\varepsilon} = \{x \in \mathcal{X} : f(x) \geq \max_{x \in \mathcal{X}} f(x) - \varepsilon\}$  be the corresponding level set and fix any  $n \in \mathbb{N}^*$ . Applying Proposition 2 gives that  $\mathbb{P}(f(X_{i_n}) < \max_{x \in \mathcal{X}} f(x) - \varepsilon) \leq \mathbb{P}(\max_{i=1 \dots n} f(X'_i) < \max_{x \in \mathcal{X}} f(x) - \varepsilon)$  where  $\{X'_i\}_{i=1}^n$  are  $n$  independent copies of  $X' \sim \mathcal{U}(\mathcal{X})$ . Using the independence of the  $\{X'_i\}_{i=1}^n$ , we get that,

$$\mathbb{P}(f(X_{i_n}) < \max_{x \in \mathcal{X}} f(x) - \varepsilon) \leq \mathbb{P}(X'_1 \notin \mathcal{X}_{f^*-\varepsilon})^n = \left(1 - \frac{\mu(\mathcal{X}_{f^*-\varepsilon})}{\mu(\mathcal{X})}\right)^n.$$

Since  $\mu(\mathcal{X}_{f^*-\varepsilon}) > 0$  by the identifiability condition, we have that  $\mathbb{P}(f(X_{i_n}) < \max_{x \in \mathcal{X}} f(x) - \varepsilon) \xrightarrow{n \rightarrow \infty} 0$ .  $\square$

**Proof of Theorem 1.** (UPPER BOUND) We use the same notations and assumptions as in Definition 5 and we further assume that the function  $f$  has  $(\alpha, c_\alpha)$ -regular level set. Since the true ranking  $r_f \in \mathcal{R} \subseteq \mathcal{R}_\infty$  is continuous, there exists a continuous function  $h \in \mathcal{C}^0(\mathcal{X}, \mathbb{R})$  such that  $r_h = r_f$  (see Proposition 1). Therefore, without loss of generality, one can assume that the  $f$  is continuous (all the arguments used in the proofs only use function comparisons). We also set some additional notations: let  $r_{\delta,n} = c_\alpha c_\alpha^{1/(1+\alpha)} \text{diam}(\mathcal{X})^{1/(1+\alpha)^2} (\ln(1/\delta)/n)^{1/d(1+\alpha)^2}$ ,  $r'_{\delta,n} = (r_{\delta,n}/c_\alpha)^{1+\alpha}$  and  $r''_{\delta,n} = (r'_{\delta,n}/c_\alpha)^{1+\alpha} = \text{diam}(\mathcal{X}) (\ln(1/\delta)/n)^{1/d}$ . First, note that the result trivially holds when  $r_{\delta,n} \geq \max_{x \in \mathcal{X}} \|x - x^*\|_2$ . Now, assume that  $r_{\delta,n} < \max_{x \in \mathcal{X}} \|x - x^*\|_2$  (it also implies, thanks to the level set assumption, that  $\ln(1/\delta) < n$ ). Using the second inclusion of Lemma 4 and Theorem 1, we have that,

$$\begin{aligned} \mathbb{P}(\|X_{i_n} - x^*\|_2 \leq r_{\delta,n}) &= \mathbb{P}(X_{i_n} \in B(x^*, r_{\delta,n})) \\ &\geq \mathbb{P}(f(X_{i_n}) \geq \min_{x \in \mathcal{S}'_{r'_{\delta,n}}} f(x)) && \text{(Lemma 4)} \\ &\geq \mathbb{P}(\max_{i=1 \dots n} f(X'_i) \geq \min_{x \in \mathcal{S}'_{r'_{\delta,n}}} f(x)), && \text{(Theorem 1)} \end{aligned}$$

where  $\{X'_i\}_{i=1}^n$  are  $n$  i.i.d. copies of  $X \sim \mathcal{U}(\mathcal{X})$ . Now, using the first inclusion of Lemma 4 and the fact that  $\{X'_i\}_{i=1}^n$  are  $n$  independent random variables uniformly distributed over  $\mathcal{X}$ , we have that,

$$\mathbb{P}(\|X_{i_n} - x^*\|_2 \leq r_{\delta,n}) \geq \mathbb{P}\left(\bigcup_{i=1}^n \{X'_i \in \mathcal{X} \cap B(x^*, r''_{\delta,n})\}\right) \stackrel{\text{i.i.d.}}{=} 1 - \left(1 - \frac{\mu(\mathcal{X} \cap B(x^*, r''_{\delta,n}))}{\mu(\mathcal{X})}\right)^n.$$

Applying lemma 5 gives us that  $\mu(\mathcal{X} \cap B(x^*, r''_{\delta,n}))/\mu(\mathcal{X}) \leq (r''_{\delta,n}/\text{diam}(\mathcal{X}))^d = \ln(1/\delta)/n$ . Therefore,

$$\mathbb{P}(\|X_{i_n} - x^*\|_2 \leq r_{\delta,n}) \geq 1 - \left(1 - \frac{\ln(1/\delta)}{n}\right)^n.$$

Finally, using the fact that  $1 - x \leq e^{-x}$  for any  $x \in \mathbb{R}$  gives us that  $\mathbb{P}(\|X_{i_n} - x^*\|_2 \leq r_{\delta,n}) \geq 1 - \delta$ .  $\square$

**Proof of Proposition 3.** We prove the proposition by induction and we use the same notations and assumptions as in Definition 6. Since  $X_1$  and  $X_1^*$  are uniformly distributed over  $\mathcal{X}$ , the result trivially holds for  $n = 1$ . Assume that the statement holds for a fixed  $n \in \mathbb{N}^*$ . As mentioned in the proof of Proposition 2, the result trivially holds for any  $y \leq \min_{x \in \mathcal{X}} f(x)$  and any  $y \geq \max_{x \in \mathcal{X}} f(x)$ . Fix any  $y \in (\min_{x \in \mathcal{X}} f(x), \max_{x \in \mathcal{X}} f(x))$  and let  $\mathcal{X}_y = \{x \in \mathcal{X} : f(x) \geq y\}$  be the corresponding level set. Let  $\{X_i\}_{i=1}^n$  be a sequence distributed as the RANKOPT process (Definition 5), let  $\mathcal{X}_n$  be the corresponding sampling area and let  $\mathcal{X}_{f(X_{i_n})} = \{x \in \mathcal{X} : f(x) \geq f(X_{i_n})\}$  be the level set of the highest value

observed so far. Reproducing the same steps as in the proof of Proposition 2 gives us that,

$$\mathbb{P}(f(X_{\hat{i}_{n+1}}) \geq y) = \mathbb{E} \left[ \mathbb{1}\{f(X_{\hat{i}_n}) \geq y\} + \frac{\mu(\mathcal{X}_y \cap \mathcal{X}_n)}{\mu(\mathcal{X}_n)} \cdot \mathbb{1}\{f(X_{\hat{i}_n}) < y\} \right]$$

Applying Lemma 1 gives us that on the event  $\{f(X_{\hat{i}_n}) < y\}$ , we also have that  $\{\mathcal{X}_y \subseteq \mathcal{X}_{f(X_{\hat{i}_n})} \subseteq \mathcal{X}_n\}$ . Therefore, we have that,

$$\mathbb{P}(f(X_{\hat{i}_{n+1}}) \geq y) \leq \mathbb{E} \left[ \mathbb{1}\{f(X_{\hat{i}_n}) \geq y\} + \frac{\mu(\mathcal{X}_y)}{\mu(\mathcal{X}_{f(X_{\hat{i}_n})})} \mathbb{1}\{f(X_{\hat{i}_n}) < y\} \right] = \mathbb{E} \left[ \min \left( 1, \frac{\mu(\mathcal{X}_y)}{\mu(\mathcal{X}_{f(X_{\hat{i}_n})})} \right) \right]$$

Using the fact that  $\mathbb{E}[X] = \int_0^1 \mathbb{P}(X > t) dt$  for any random variable  $X \in [0, 1]$ , we get that,

$$\mathbb{P}(f(X_{\hat{i}_{n+1}}) \geq y) \leq \int_0^1 \mathbb{P} \left( \min \left( 1, \frac{\mu(\mathcal{X}_y)}{\mu(\mathcal{X}_{f(X_{\hat{i}_n})})} \right) > t \right) dt = \frac{\mu(\mathcal{X}_y)}{\mu(\mathcal{X})} + \int_{\frac{\mu(\mathcal{X}_y)}{\mu(\mathcal{X})}}^1 \mathbb{P} \left( \mu(\mathcal{X}_{f(X_{\hat{i}_n})}) < \frac{\mu(\mathcal{X}_y)}{t} \right) dt \quad (5)$$

Now, let  $\{X_i^*\}_{i=1}^{n+1}$  be a sequence distributed as a PAS process (Definition 6). Reproducing the same steps, we get that

$$\mathbb{P}(f(X_{n+1}^*) \geq y) = \mathbb{E} \left[ \min \left( 1, \frac{\mu(\mathcal{X}_y)}{\mu(\mathcal{X}_{f(X_n^*)})} \right) \right] = \frac{\mu(\mathcal{X}_y)}{\mu(\mathcal{X})} + \int_{\frac{\mu(\mathcal{X}_y)}{\mu(\mathcal{X})}}^1 \mathbb{P} \left( \mu(\mathcal{X}_{f(X_n^*)}) < \frac{\mu(\mathcal{X}_y)}{t} \right) dt. \quad (6)$$

Now, fix any  $t \in (\mu(\mathcal{X}_y)/\mu(\mathcal{X}), 1)$  and let  $\bar{y}_t = \min\{y' \in \text{Im}(f) : \mu(\mathcal{X}_{y'}) < \mu(\mathcal{X}_y)/t\}$ . Using the induction assumption, we get that,

$$\mathbb{P} \left( \mu(\mathcal{X}_{f(X_{\hat{i}_n})}) < \frac{\mu(\mathcal{X}_y)}{t} \right) = \mathbb{P}(f(X_{\hat{i}_n}) \geq \bar{y}_t) \leq \mathbb{P}(f(X_n^*) \geq \bar{y}_t) = \mathbb{P} \left( \mu(\mathcal{X}_{f(X_n^*)}) < \frac{\mu(\mathcal{X}_y)}{t} \right). \quad (7)$$

Since the previous inequality holds for any  $t \in (\mu(\mathcal{X}_y)/\mu(\mathcal{X}), 1)$ , plugging equation (7) into inequality (5) and comparing the result with equation (6) gives that  $\mathbb{P}(f(X_{\hat{i}_n}) \geq y) \leq \mathbb{P}(f(X_n^*) \geq y)$ .  $\square$

**Proof of Theorem 2.** (LOWER BOUND) We use the same notations and assumptions as in Definition 5 and we further assume that the function  $f$  has  $(\alpha, c_\alpha)$ -regular level sets. As mentioned in the proof of Theorem 1, since the true ranking  $r_f \in \mathcal{R} \subseteq \mathcal{R}_\infty$  is continuous, there exists a continuous function  $h \in \mathcal{C}^0(\mathcal{X}, \mathbb{R})$  such that  $r_h = r_f$  (see Proposition 1). Therefore, one can assume, without loss of generality, that the function  $f$  is continuous (all the arguments used in the proofs only use function comparisons). We also set some additional notations: let  $r_{\delta,n} = c_\alpha^{-(1+\alpha)(2+\alpha)} \text{rad}(\mathcal{X})^{(1+\alpha)^2} \delta^{(1+\alpha)^2/d} \exp(-(1+\alpha)^2(n + \sqrt{2n \ln(1/\delta)})/d)$ ,  $r'_{\delta,n} = c_\alpha r_{\delta,n}^{1/(1+\alpha)}$  and  $r''_{\delta,n} = c_\alpha r'_{\delta,n}^{1/(1+\alpha)} = \text{rad}(\mathcal{X}) \delta^{1/d} \exp(-(n + \sqrt{2n \ln(1/\delta)})/d)$ . Using the first inclusion of Lemma 4 and Proposition 3 gives that,

$$\begin{aligned} \mathbb{P}(\|X_{\hat{i}_n} - x^*\|_2 \leq r_{\delta,n}) &= \mathbb{P}(X_{\hat{i}_n} \in B(x^*, r_{\delta,n}) \cap \mathcal{X}) \\ &\leq \mathbb{P}(f(X_{\hat{i}_n}) \geq \min_{x \in \mathcal{S}_{r'_{\delta,n}}} f(x)) && \text{(Lemma 4)} \\ &\leq \mathbb{P}(f(X_n^*) \geq \min_{x \in \mathcal{S}_{r'_{\delta,n}}} f(x)), && \text{(Proposition 3)} \end{aligned}$$

where  $\{X_i^*\}_{i=1}^n$  is a sequence distributed as the PAS process (Definition 6). Now, denoting by  $\mathcal{X}_n^* = \{x \in \mathcal{X} : f(x) \geq f(X_n^*)\}$  the sampling area of the PAS process after  $n$  iterations and using the second inclusion of Lemma 4 gives that,

$$\mathbb{P}(\|X_{\hat{i}_n} - x^*\|_2 \leq r_{\delta,n}) \leq \mathbb{P} \left( \mu(\mathcal{X}_n^*) \leq \mu(\{x \in \mathcal{X} : f(x) \geq \min_{x \in \mathcal{S}_{r'_{\delta,n}}} f(x)\}) \right) \leq \mathbb{P} \left( \frac{\mu(\mathcal{X}_n^*)}{\mu(\mathcal{X})} \leq \frac{\mu(B(x^*, r'_{\delta,n}))}{\mu(\mathcal{X})} \right).$$

Using the definition of  $\text{rad}(\mathcal{X})$ , we know that there exists  $x' \in \mathcal{X}$  such that  $B(x', \text{rad}(\mathcal{X})) \subseteq \mathcal{X}$ . Hence,  $\mu(\mathcal{X}) \geq \mu(B(x', \text{rad}(\mathcal{X})))$ . Therefore, using the volume of the ball (see Lemma 5) we get that,

$$\mathbb{P}(\|X_{\hat{i}_n} - x^*\|_2 \leq r_{\delta,n}) \leq \mathbb{P} \left( \frac{\mu(\mathcal{X}_n^*)}{\mu(\mathcal{X})} \leq \frac{\mu(B(x^*, r'_{\delta,n}))}{\mu(B(x', \text{rad}(\mathcal{X})))} \right) = \mathbb{P} \left( \frac{\mu(\mathcal{X}_n^*)}{\mu(\mathcal{X})} \leq \left( \frac{r'_{\delta,n}}{\text{rad}(\mathcal{X})} \right)^d \right).$$

Applying Lemma 2 and using the fact that  $(r''_{\delta,n}/\text{rad}(\mathcal{X}))^d = \delta \exp(-n - \sqrt{2n \ln(1/\delta)})$  gives that

$$\mathbb{P}(\|X_{i_n} - x^*\|_2 \leq r_{\delta,n}) = \mathbb{P}\left(\prod_{i=1}^n U_i \leq \delta \cdot e^{-n - \sqrt{2n \ln(1/\delta)}}\right)$$

where  $\{U_i\}_{i=1}^n$  is a sequence of  $n$  i.i.d. copies of  $U \sim \mathcal{U}([0, 1])$ . Applying Lemma 3 finally gives us that  $\mathbb{P}(\|X_{i_n} - x^*\|_2 \leq r_{\delta,n}) < \delta$ .  $\square$

## C. Proofs of section 4

### C.1. AdaRank process and additional results

**Definition 7.** (ADARANKOPT PROCESS) Fix any  $p \in (0, 1)$ , let  $\{\mathcal{R}_N\}_{N \in \mathbb{N}^*}$  be any sequence of nested sets of rankings and let  $f : \mathcal{X} \rightarrow \mathbb{R}$  be any function such that  $r_f \in \mathcal{R}_\infty$ . We say that the sequence  $\{X_i\}_{i=1}^n$  is distributed as the ADARANKOPT( $n, f, \mathcal{X}, p, \{\mathcal{R}_N\}_{N \in \mathbb{N}^*}$ ) process if the sequence has the same distribution as the process defined by:

$$\begin{cases} X_1 \sim \mathcal{U}(\mathcal{X}) \\ X_{t+1} | B_{t+1}, \{X_i\}_{i=1}^t \sim B_{t+1} \cdot \mathcal{U}(\mathcal{X}) + (1 - B_{t+1}) \cdot \mathcal{U}(\mathcal{X}_t) \quad \forall t \in \{1 \dots n-1\} \end{cases}$$

where  $\mathcal{X}_t = \{x \in \mathcal{X} : \exists r \in \mathcal{R}_{N_t}, r(x, X_{i_t}) \geq 0\}$  denotes the sampling area,  $N_t = \min\{N \in \mathbb{N}^* : \min_{r \in \mathcal{R}_N} L_t(r) = 0\}$  denotes the index of the smallest set of rankings that may contain  $r_f$ ,  $\hat{i}_t \in \arg \max_{i=1 \dots t} f(X_i)$  denotes the index of the best value observed so far and  $B_{t+1}$  is a Bernoulli random variable of parameter  $p$  (i.e.  $p = \mathbb{P}(B_{t+1} = 1) = 1 - \mathbb{P}(B_{t+1} = 0)$ ), independent of  $\{X_i\}_{i=1}^t$  and  $\{B_i\}_{i=1}^t$ .

The next proposition will be needed later.

**Proposition 9.** [From (Cl emen on et al., 2010)] Let  $\{X_i\}_{i=1}^n$  be a sequence of  $n$  independent copies of  $X \sim \mathcal{U}(\mathcal{X})$ , let  $\mathcal{R}$  be any set of rankings and let  $f$  be any function defined on  $\mathcal{X}$  taking values in  $\mathbb{R}$ . Define the Rademacher average

$$R_n(\mathcal{R}) = \sup_{r \in \mathcal{R}} \frac{1}{\lfloor n/2 \rfloor} \left| \sum_{i=1}^{\lfloor n/2 \rfloor} \epsilon_i \cdot \mathbb{1}\{r_f(X_i, X_{\lfloor n/2 \rfloor + i}) \neq r(X_i, X_{\lfloor n/2 \rfloor + i})\} \right|$$

where  $\{\epsilon_i\}_{i=1}^{\lfloor n/2 \rfloor}$  are  $\lfloor n/2 \rfloor$  independent Rademacher random variables (i.e., random symmetric sign variables), independent of  $\{X_i\}_{i=1}^n$ . Then, for any  $\delta \in (0, 1)$ , with probability at least  $1 - \delta$ ,

$$\forall r \in \mathcal{R}, |L_n(r) - L(r)| \leq 2\mathbb{E}[R_n(\mathcal{R})] + 2\sqrt{\frac{\log(1/\delta)}{n-1}},$$

where  $L(r) = \mathbb{P}(r_f(X, X') \neq r(X, X'))$  denotes the true ranking loss and  $(X, X')$  is a couple of independent random variables uniformly distributed over  $\mathcal{X}$ .

**Corollary 3.** Assume that there exists  $V > 0$  such that  $\mathbb{E}[R_n(\mathcal{R})] \leq \sqrt{V/n}$  for any  $n \in \mathbb{N}^*$  and assume that  $\inf_{r \in \mathcal{R}} L(r) > 0$ . Let  $\{X_i\}_{i \in \mathbb{N}^*}$  be a sequence of i.i.d. random variables uniformly distributed over  $\mathcal{X}$  and let  $\tau = \min\{n \in \mathbb{N}^* : \min_{r \in \mathcal{R}} L_n(r) > 0\}$  be the stopping time corresponding to the number of samples required to be certain that  $r_f \notin \mathcal{R}$  where  $L_n$  denotes the empirical ranking loss taken over the first  $n$  samples  $\{X_i\}_{i=1}^n$ . Then, for any  $\delta \in (0, 1)$ , with probability at least  $1 - \delta$ ,

$$\tau \leq 10 \cdot \left( \frac{V + \log(1/\delta)}{\inf_{r \in \mathcal{R}} L(r)^2} \right).$$

*Proof.* Fix any  $\delta \in (0, 1)$ , let  $n_\delta = \lfloor 10 \cdot (V + \log(1/\delta)) / (\inf_{r \in \mathcal{R}} L(r)^2) \rfloor$  be the integer part of the upper bound and let  $L_{n_\delta}$  be the empirical ranking loss taken over the first  $n_\delta$  i.i.d. samples of the sequence  $\{X_i\}_{i=1}^{n_\delta}$ . By definition, we have

that  $\mathbb{P}(\tau \leq n_\delta) = \mathbb{P}(\min_{r \in \mathcal{R}} L_{n_\delta}(r) > 0)$ . Now, since  $L(r) \geq \min_{r \in \mathcal{R}} L(r)$  for any  $r \in \mathcal{R}$ , applying Proposition 9 gives us that, with probability at least  $1 - \delta$ ,

$$\min_{r \in \mathcal{R}} L_{n_\delta}(r) \geq \inf_{r \in \mathcal{R}} L(r) - 2\sqrt{\frac{V}{n_\delta}} - 2\sqrt{\frac{\log(1/\delta)}{n_\delta - 1}}.$$

We end the proof by pointing out that the right hand term of the previous inequality is strictly positive due to the definition of  $n_\delta$ .  $\square$

## C.2. Proofs of the results

**Proof of Proposition 4.** (CONSISTENCY) We use the same notations and assumptions as in Definition 7 and we further assume that the maximum of the function  $f$  is identifiable. Fix any  $\varepsilon > 0$  and let  $\mathcal{X}_{f^*-\varepsilon} = \{x \in \mathcal{X} : f(x) \geq \max_{x \in \mathcal{X}} f(x) - \varepsilon\}$  be the corresponding level set. We show by induction that, for any  $n \in \mathbb{N}^*$ ,

$$\mathbb{P}(f(X_{i_n}) < \max_{x \in \mathcal{X}} f(x) - \varepsilon) \leq \left(1 - p \cdot \frac{\mu(\mathcal{X}_{f^*-\varepsilon})}{\mu(\mathcal{X})}\right)^n \xrightarrow{n \rightarrow \infty} 0.$$

- Since  $X_1 \sim \mathcal{U}(\mathcal{X})$ , we directly get that,

$$\mathbb{P}(f(X_{i_1}) < \max_{x \in \mathcal{X}} f(x) - \varepsilon) = \mathbb{P}(X_1 \notin \mathcal{X}_{f^*-\varepsilon}) = \left(1 - \frac{\mu(\mathcal{X}_{f^*-\varepsilon})}{\mu(\mathcal{X})}\right) \leq \left(1 - p \cdot \frac{\mu(\mathcal{X}_{f^*-\varepsilon})}{\mu(\mathcal{X})}\right).$$

- Assume that the statement holds for a fixed  $n \in \mathbb{N}^*$  and let  $\{X_i\}_{i=1}^{n+1}$  be a sequence of  $n+1$  random variables distributed as the ADARANKOPT process. Conditioning on  $\{X_i\}_{i=1}^n$  gives us that

$$\mathbb{P}(f(X_{i_{n+1}}) < \max_{x \in \mathcal{X}} f(x) - \varepsilon) = \mathbb{P}\left(\bigcap_{i=1}^{n+1} \{X_i \notin \mathcal{X}_{f^*-\varepsilon}\}\right) = \mathbb{E}\left[\mathbb{P}(X_{n+1} \notin \mathcal{X}_{f^*-\varepsilon} | \{X_i\}_{i=1}^n) \cdot \mathbb{1}\left\{\bigcap_{i=1}^n \{X_i \notin \mathcal{X}_{f^*-\varepsilon}\}\right\}\right]$$

Now, using the distribution of  $X_{n+1} | \{X_i\}_{i=1}^n$  (Definition 7), we get that,

$$\begin{aligned} \mathbb{P}(f(X_{i_{n+1}}) < \max_{x \in \mathcal{X}} f(x) - \varepsilon) &= \mathbb{E}\left[\left(1 - p \cdot \frac{\mu(\mathcal{X}_{f^*-\varepsilon})}{\mu(\mathcal{X})} - (1-p) \cdot \frac{\mu(\mathcal{X}_n \cap \mathcal{X}_{f^*-\varepsilon})}{\mu(\mathcal{X}_n)}\right) \cdot \mathbb{1}\left\{\bigcap_{i=1}^n \{X_i \notin \mathcal{X}_{f^*-\varepsilon}\}\right\}\right] \\ &\leq \left(1 - p \cdot \frac{\mu(\mathcal{X}_{f^*-\varepsilon})}{\mu(\mathcal{X})}\right) \cdot \mathbb{P}\left(\bigcap_{i=1}^n \{X_i \notin \mathcal{X}_{f^*-\varepsilon}\}\right). \end{aligned}$$

Plugging the induction assumption into the previous equation gives the result.  $\square$

**Proof of Proposition 5.** (STOPPING TIME UPPER BOUND) We use the same assumptions and notations as in Definition 7. Let  $\{X_i\}_{i \in \mathbb{N}^*}$  be a sequence distributed as the ADARANKOPT and let  $\{B_i\}_{i \in \mathbb{N}^*}$  be the sequence of associated random variables corresponding to the exploration/exploitation tradeoff. Assume that  $1 < N^* = \min\{N \in \mathbb{N}^* : r_f \in \mathcal{R}_N\} < \infty$ , assume that there exists a constant  $V > 0$  such that  $\mathbb{E}[R_n(\mathcal{R}_{N^*-1})] \leq \sqrt{V/n}$  for any  $n \in \mathbb{N}^*$  and assume that  $\inf_{r \in \mathcal{R}_{N^*-1}} L(r) > 0$ . Fix any  $\delta \in (0, 1)$ , let  $n_\delta = \lfloor 10 \cdot (V + \log(2/\delta)) / (p \cdot \inf_{r \in \mathcal{R}_{N^*-1}} L(r)^2) \rfloor$  be the integer part of the upper bound, let  $n'_\delta = \lfloor p \cdot n_\delta - \sqrt{n_\delta \log(2/\delta)/2} \rfloor$  and denote by  $L_{n_\delta}$  the empirical ranking loss taken over the  $n_\delta$  first samples  $\{X_i\}_{i=1}^{n_\delta}$ . Since  $\{\mathcal{R}_N\}_{N \in \mathbb{N}^*}$  forms a nested sequence  $\min_{r \in \mathcal{R}_1} L_{n_\delta}(r) \leq \min_{r \in \mathcal{R}_2} L_{n_\delta}(r) \leq \dots \leq \min_{r \in \mathcal{R}_{N^*-1}} L_{n_\delta}(r)$ . Therefore,

$$\mathbb{P}(\tau \leq n_\delta) = \mathbb{P}\left(\min_{r \in \mathcal{R}_{N^*-1}} L_{n_\delta}(r) > 0\right) \geq \mathbb{P}\left(\min_{r \in \mathcal{R}_{N^*-1}} L_{n_\delta}(r) > 0 \cap \left\{\sum_{i=1}^{n_\delta} B_i \geq n'_\delta\right\}\right). \quad (8)$$

We now lower bound the empirical risk by only keeping the first  $n'_\delta$  (i.i.d.) explorative samples:

$$L_{n_\delta}(r) \geq \frac{2}{n_\delta(n_\delta - 1)} \sum_{1 \leq i < j \leq n_\delta} \mathbb{1}\{r_f(X_i, X_j) \neq r(X_i, X_j)\} \cdot \mathbb{1}\{(i, j) \in I^2\},$$



where  $I = \{i \in \mathbb{N}^* : B_i = 1 \text{ and } \sum_{j=1}^i B_j \leq n'_\delta\}$ . Conditioning on  $|I|$  and using Definition 7 gives us that  $\{X_i\}_{i \in I} | |I|$  is a sequence of  $|I|$  independent random variables uniformly distributed over  $\mathcal{X}$ . Therefore, on the event  $\{\sum_{i=1}^{n'_\delta} B_i \geq n'_\delta\} = \{|I| = n'_\delta\}$ , the right hand term of the previous inequality has the same distribution as,

$$L_{n'_\delta}(r) = \frac{2}{n_\delta(n_\delta - 1)} \sum_{1 \leq i < j \leq n_\delta} \mathbb{1}\{r_f(X'_i, X'_j) \neq r(X'_i, X'_j)\}$$

where  $\{X'_i\}_{i=1}^{n'_\delta}$  is a sequence of  $n'_\delta$  i.i.d. copies of  $X \sim \mathcal{U}(\mathcal{X})$ , independent of  $\{B_i\}_{i=1}^{n_\delta}$ . Combining the previous statement with (8) gives us that,

$$\mathbb{P}(\tau \leq n_\delta) \geq \mathbb{P}\left(\min_{r \in \mathcal{R}_{N^*-1}} L_{n'_\delta}(r) > 0\right) \cdot \mathbb{P}\left(\sum_{i=1}^{n_\delta} B_i \geq n'_\delta\right),$$

where the empirical risk is taken over a sample of  $n_\delta$  independent copies of  $X \sim \mathcal{U}(\mathcal{X})$ . Due to the definition of  $n'_\delta$ , applying Corollary 3 gives us that  $\mathbb{P}(\min_{r \in \mathcal{R}_{N^*-1}} L_{n'_\delta}(r) > 0) \geq 1 - \delta/2$  and using Hoeffding's inequality gives us that  $\mathbb{P}(\sum_{i=1}^{n_\delta} B_i \geq n'_\delta) \geq 1 - \delta/2$ . Noticing that  $(1 - \delta/2)^2 \geq 1 - \delta$ , for any  $\delta \in (0, 1)$  completes the proof.  $\square$

**Proof of Theorem 3.** (UPPER BOUND) We use the same setting as in the previous proof: we use the same assumptions and notations as in Definition 7, we assume  $1 < N^* < \infty$ , we assume that there exists  $V > 0$  such that  $\mathbb{E}[R_n(\mathcal{R}_{N^*-1})] \leq \sqrt{V/n}$  for all  $n \in \mathbb{N}^*$  and we assume that  $\inf_{r \in \mathcal{R}_{N^*-1}} L(r) > 0$ . Let  $\{X_i\}_{i \in \mathbb{N}^*}$  be a sequence distributed as the ADARANKOPT and let  $\{N_t\}_{t \in \mathbb{N}^*}$  be the random variables corresponding to the model selection. Fix any  $\delta \in (0, 1)$ , let  $n_{\delta/2} = \lfloor 10(V + \ln(4/\delta))/(p \cdot \inf_{r \in \mathcal{R}_{N^*-1}} L(r)^2) \rfloor$  be the integer part of the upper bound of proposition 5 (with probability  $1 - \delta/2$ ) and let  $r_{\delta/2, n}$  be the upper bound of the Theorem 1 (with probability  $1 - \delta/2$ ). Fix any  $n > n_{\delta/2}$ , let  $\{X_i\}_{i=1}^n$  be a sequence distributed as the ADARANKOPT process (Definition 7) and let  $\tau_{N^*} = \min\{t \in \{1 \dots n\} : N_t = N^*\}$  be the stopping time corresponding to the number of iterations required to identify the true ranking structure  $\mathcal{R}_{N^*}$ . Applying the Bayes rules gives us that

$$\mathbb{P}(\|X_{i_n} - x^*\|_2 \leq r_{\delta, n}) \geq \mathbb{P}(\|X_{i_n} - x^*\|_2 \leq r_{\delta, n} \mid \tau_{N^*} < n_{\delta/2}) \cdot \mathbb{P}(\tau_{N^*} < n_{\delta/2}).$$

Applying proposition 5 gives us that  $\mathbb{P}(\tau < n_{\delta/2}) \geq 1 - \delta/2$ . To lower bound the first term, we use the fact that on the event  $\{\tau < n_{\delta/2}\}$ , for any iteration  $n > n_{\delta/2}$ , the true ranking structure  $\mathcal{R}_{N^*}$  is identified. Therefore, one can bound the distance  $\|X_{i_n} - x^*\|_2$  by using the  $n - n_{\delta/2}$  samples with a similar technique as the one used in the RANKOPT process when the ranking structure is known (see proof of Theorem 1) and we get that  $\mathbb{P}(\|X_{i_n} - x^*\|_2 \leq r_{\delta, n} \mid \tau < n_{\delta/2}) \geq 1 - \delta/2$ . Noticing that  $(1 - \delta/2)^2 \geq 1 - \delta$  for any  $\delta \in (0, 1)$  ends the proof.  $\square$

## D. Proofs of section 6

### D.1. Convex hulls and technical lemmas

**Definition 8.** Let  $\{X_i\}_{i=1}^n$  be any set of  $n$  points of  $\mathbb{R}^d$ . The convex hull of  $\{X_i\}_{i=1}^n$  can be defined as

$$\text{CH}\{X_i\}_{i=1}^n = \left\{ \sum_{i=1}^n \lambda_i X_i : (\lambda_1, \dots, \lambda_n) \in \mathbb{R}_+^n, \sum_{i=1}^n \lambda_i = 1 \right\}, \text{ where } \mathbb{R}_+ = \{x \in \mathbb{R} : x \geq 0\}.$$

**Lemma 6.** Fix any  $\epsilon > 0$ , let  $\mathcal{X} \subset \mathbb{R}^d$  be any compact and convex set and let  $B(\mathcal{X}, \epsilon) = \{x \in \mathbb{R}^d : d(x, \mathcal{X}) \leq \epsilon\}$  be the  $\epsilon$ -ball of  $\mathcal{X}$  where  $d(x, \mathcal{X}) = \min_{x' \in \mathcal{X}} \|x - x'\|_2$  denotes the distance between  $x \in \mathbb{R}^d$  and  $\mathcal{X}$ . Then, the  $\epsilon$ -ball of  $\mathcal{X}$   $B(\mathcal{X}, \epsilon)$  is also a convex set

*Proof.* Fix any  $\epsilon > 0$  and let  $(b_1, b_2) \in B(\mathcal{X}, \epsilon)$  be any pair of points that belong to the  $\epsilon$ -ball of  $\mathcal{X}$ . Since  $b_1 \in B(\mathcal{X}, \epsilon)$ , there exists  $x_1 \in \mathcal{X}$  and  $\epsilon_1 \in \mathbb{R}^d$  satisfying  $\|\epsilon_1\|_2 \leq \epsilon$  such that  $b_1 = x_1 + \epsilon_1$ . We also know that there also exists  $b_2$  and  $\epsilon_2$  satisfying the same conditions such that  $b_2 = x_2 + \epsilon_2$ . Now, fix any  $\lambda \in (0, 1)$ . The convexity of  $\mathcal{X}$  implies that

$$(1 - \lambda)b_1 + \lambda b_2 = \underbrace{\lambda x_1 + (1 - \lambda)x_2}_{\in \mathcal{X}} + \underbrace{\lambda \epsilon_1 + (1 - \lambda)\epsilon_2}_{\|\cdot\|_2 \leq \epsilon}.$$

Therefore,  $(1 - \lambda)b_1 + \lambda b_2 \in B(\mathcal{X}, \epsilon)$  also belongs to the  $\epsilon$ -ball. Since the result holds for any  $(b_1, b_2) \in B(\mathcal{X}, \epsilon)$  and any  $\lambda \in (0, 1)$ , we deduce that  $B(\mathcal{X}, \epsilon)$  is also a convex set.  $\square$

**Lemma 7.** *Let  $\{X_i\}_{i=1}^n$  be any set of  $n$  points of  $\mathbb{R}^d$ . Then, there exists a separating hyperplane  $h \in \mathbb{R}^d$  such that  $\langle h, X_i \rangle > 0$  for any  $i \in \{1 \dots n\}$  if and only if  $\vec{0} \notin \text{CH}\{X_i\}_{i=1}^n$  where  $\vec{0} = \{0 \dots 0\} \in \mathbb{R}^d$ .*

*Proof.* ( $\Rightarrow$ ) Assume that there exists  $h \in \mathbb{R}^d$  such that  $\langle h, X_i \rangle > 0$  for all  $i \in \{1 \dots n\}$ . We show (by contradiction) that  $\vec{0} \notin \text{CH}\{X_i\}_{i=1}^n$ . If  $\vec{0} \in \text{CH}\{X_i\}_{i=1}^n$ , it implies that there exists  $(\lambda_1, \dots, \lambda_n) \in \mathbb{R}_+^n$  such that  $\vec{0} = \sum_{i=1}^n \lambda_i X_i$  and  $\sum_{i=1}^n \lambda_i = 1$  (see Definition 8). It leads us to the contradiction

$$0 = \langle h, \vec{0} \rangle = \sum_{i=1}^n \lambda_i \langle h, X_i \rangle > 0.$$

( $\Leftarrow$ ) Assume that  $\vec{0} \notin \text{CH}\{X_i\}_{i=1}^n$ . Since  $n$  and  $d$  are finite  $\text{CH}\{X_i\}_{i=1}^n$  is a closed, compact and convex set. Therefore,  $\min_{x \in \text{CH}\{X_i\}_{i=1}^n} \|x\|_2 = d$  exists and the condition  $\vec{0} \notin \text{CH}$  implies that  $d > 0$ . Let  $x_d \in \text{CH}\{X_i\}_{i=1}^n$  be the (unique) point of the convex hull that satisfies  $\|x_d\|_2 = d$ . We show (by contradiction) that for any  $x \in \text{CH}\{X_i\}_{i=1}^n$  we have that  $\langle x, x_d \rangle \geq d^2$ . Assume that there exists  $x' \in \text{CH}\{X_i\}_{i=1}^n$  such that  $\langle x', x_d \rangle < d^2$ . The convexity of  $\text{CH}\{X_i\}_{i=1}^n$  implies that the whole line  $L = (x', x_d) \subseteq \text{CH}\{X_i\}_{i=1}^n$  also belongs to the convex hull. However, since  $\|x_d\|_2 = d$  and  $\langle x', x_d \rangle < \|x_d\|_2^2$ , the line  $L$  is not tangent and intersect the ball the ball  $B(\vec{0}, d)$ . We deduce that there exists  $x'' \in L \cap B(\vec{0}, d)$  such that  $\|x''\|_2 < d$ . Since  $x'' \in L \subseteq \text{CH}\{X_i\}_{i=1}^n$  also belongs to the convex hull, the previous statement leads us to the contradiction

$$\min_{x \in \text{CH}\{X_i\}_{i=1}^n} \|x\|_2 \leq \|x''\|_2 < d = \min_{x \in \text{CH}\{X_i\}_{i=1}^n} \|x\|_2.$$

Therefore, for any  $x \in \text{CH}\{X_i\}_{i=1}^n$  we have that  $\langle x_d, x \rangle \geq d > 0$ . Finally, since  $\{X_i\}_{i=1}^n \in \text{CH}\{X_i\}_{i=1}^n$ , there exists  $h = x_d \in \mathbb{R}^d$  such that  $\langle h, X_i \rangle > 0$  for all  $i \in \{1 \dots n\}$ .  $\square$

**Lemma 8.** *Let  $\mathcal{R} \subseteq \mathcal{R}_\infty$  be any continuous ranking structure, let  $\{(X_i, f(X_i))\}_{i=1}^{n+1}$  be any sample satisfying  $f(X_{(1)}) < f(X_{(2)}) < \dots < f(X_{(n+1)})$  and denote by  $L_{n+1}$  the empirical ranking loss taken over the sample. Then, we have the following equivalence:*

$$\{r \in \mathcal{R} : L_{n+1}(r) = 0\} = \{r \in \mathcal{R} : r(X_{(i+1)}, X_{(i)}) = 1, \forall i \in \{1 \dots n\}\}.$$

*Proof.* ( $\subseteq$ ) The first inclusion is a direct consequence of the definition of the empirical ranking loss. Let  $r \in \mathcal{R}$  be any ranking such that  $L_{n+1}(r) = 0$ . Since  $r$  perfectly ranks the sample, it implies that for any  $i \in \{1 \dots n\}$ ,

$$r(X_{(i+1)}, X_{(i)}) = r_f(X_{(i+1)}, X_{(i)}) = \text{sgn}(f(X_{(i+1)}) - f(X_{(i)})) = 1.$$

( $\supseteq$ ) The second inclusion is a consequence of the transitivity of the rankings. Let  $r \in \mathcal{R} \subseteq \mathcal{R}_\infty$  be any ranking such that  $r(X_{(i+1)}, X_{(i)}) = 1, \forall i \in \{1 \dots n\}$ . Since  $r$  is a continuous ranking, there exists a function  $f' \in \mathcal{C}^0(\mathcal{X}, \mathbb{R})$  such that  $r(x, x') = \text{sgn}(f'(x) - f'(x')) \forall (x, x') \in \mathcal{X}^2$ . Now, fix any  $j \in \{2 \dots n+1\}$  and fix any  $k < j$ . Using the function  $f'$  and the assumption, we have that

$$r(X_{(j)}, X_{(k)}) = \text{sgn}(f'(X_{(j)}) - f'(X_{(k)})) = \text{sgn}\left(\sum_{i=k}^{j-1} |f'(X_{(i+1)}) - f'(X_{(i)})| \cdot \text{sgn}(f'(X_{(i+1)}) - f'(X_{(i)}))\right) = 1.$$

Switching  $k$  and  $j$  gives us that  $r(X_{(j)}, X_{(k)}) = -1$  for any  $j < k$ . Therefore,  $r(X_{(j)}, X_{(k)}) = \text{sgn}(f(X_{(j)}) - f(X_{(k)}))$  for any  $(j, k) \in \{1 \dots n+1\}^2$  and we deduce that  $r$  perfectly ranks the sample so  $L_{n+1}(r) = 0$ .  $\square$

## D.2. Proofs of the results

**Proof of Proposition 6.** Let  $\{(X_i, f(X_i))\}_{i=1}^n$  be any sample satisfying  $f(X_{(1)}) < f(X_{(2)}) < \dots < f(X_{(n+1)})$  and let  $\mathcal{R}_{\mathcal{P}, N}$  be the set of polynomial rankings of degree  $N$ .

( $\Rightarrow$ ) Assume that there exists  $r \in \mathcal{R}_{\mathcal{P}, N}$  such that  $L_{n+1}(r) = 0$ . Since  $r$  is induced by a polynomial of degree  $N$ , there exists a polynomial  $f'_r = \langle h_r, \phi_N(x) \rangle + c_r$  where  $h_r \in \mathbb{R}^{D(d, N)}$  and  $c_r \in \mathbb{R}$  such that  $r(x, x') = \text{sgn}(f'_r(x) - f'_r(x')) =$

$\text{sgn}(\langle h_r, \phi_N(x) \rangle + c_r - \langle h_r, \phi_N(x') \rangle - c_r) = \text{sgn}(\langle h_r, \phi_N(x) - \phi_N(x') \rangle)$ . Combining the previous statement with Lemma 8 gives the first part of the equivalence.

( $\Leftarrow$ ) Assume that there exists  $h \in \mathbb{R}^{D(d,N)}$  such that  $\langle h, \phi(X_{(i+1)}) - \phi(X_{(i)}) \rangle > 0$  for all  $i \in \{1 \dots n\}$ . Define the (multivariate) polynomial  $f'(x) = \langle h, \phi_N(x) \rangle + c$  where  $c \in \mathbb{R}$  is any constant. The polynomial ranking induced by  $f'$  is given by  $r_{f'}(x, x') = \text{sgn}(f'(x) - f'(x')) = \text{sgn}(\langle h, \phi_N(x) - \phi_N(x') \rangle) \in \mathcal{R}_N$ . Then, for any  $i \in \{1 \dots n\}$ ,

$$r_{f'}(X_{(i+1)}, X_{(i)}) = \text{sgn}(\langle h, \phi_N(x) - \phi_N(x') \rangle) = 1.$$

Using Lemma 8 directly gives that  $L_{n+1}(r_h) = 0$ , which is the second part of the equivalence.  $\square$

**Proof of Corollary 2.** Let  $\{(X_i, f(X_i))\}_{i=1}^n$  be any sample satisfying  $f(X_{(1)}) < f(X_{(2)}) < \dots < f(X_{(n+1)})$  and let  $\mathcal{R}_{\mathcal{P},N}$  be the set of polynomial rankings of degree at most  $N$ . Applying Proposition 6 and Lemma 7 gives us that,

$$\begin{aligned} \min_{r \in \mathcal{R}_{\mathcal{P},N}} L_{n+1}(r) = 0 &\Leftrightarrow \exists h \in \mathbb{R}^d \text{ s.t. } \langle h, \phi_N(X_{(i+1)}) - \phi_N(X_{(i)}) \rangle > 0, \forall i \in \{1 \dots n\} \quad (\text{Proposition 6}) \\ &\Leftrightarrow \vec{0} \notin \text{CH}\{(\phi_N(X_{(i+1)}) - \phi_N(X_{(i)}))\}_{i=1}^n. \quad (\text{Lemma 7}) \end{aligned}$$

Finally, using the definition of the convex hull, we know that  $\vec{0} \in \text{CH}\{(\phi_N(X_{(i+1)}) - \phi_N(X_{(i)}))\}_{i=1}^n$  if and only if there exists  $\lambda = (\lambda_1, \dots, \lambda_n) \in \mathbb{R}_+^n$  such that  $\sum_{i=1}^n \lambda_i (\phi_N(X_{(i+1)}) - \phi_N(X_{(i)})) = \vec{0}$  and  $\sum_{i=1}^n \lambda_i = 1$ . Putting those constraints into matricial form gives the last equivalence,

$$\min_{r \in \mathcal{R}_N} L_{n+1}(r) = 0 \Leftrightarrow \{\lambda \in \mathbb{R}^n : M_N \lambda^T = \vec{0}, \langle \vec{1}, \lambda \rangle = 1, \lambda \succeq \vec{0}\} \text{ is empty,}$$

where  $M_N$  is the  $(D(d,n), n)$ -matrix where its  $i$ -th column is equal to  $(\phi_N(X_{(i+1)}) - \phi_N(X_{(i)}))^T$  and  $\succeq$  stands for the inequality  $\geq$  component-wise (i.e.  $x \succeq x' \Leftrightarrow x_i \geq x'_i, \forall i \in \{1 \dots d\}$ ).  $\square$

**Proof of Proposition 7.** Fix any  $N \in \mathbb{N}^*$ , let  $\mathcal{R}_{C,N}$  be the set of convex rankings of degree  $N$ , let  $d = 1$  and let  $\{(X_i, f(X_i))\}_{i=1}^n$  be any sample satisfying  $f(X_{(1)}) < f(X_{(2)}) < \dots < f(X_{(n+1)})$ .

( $\Rightarrow$ ) Assume that  $\min_{r \in \mathcal{R}_{C,N}} L_{n+1}(r) = 0$  and let  $r \in \mathcal{R}_{C,N}$  be any convex ranking that perfectly ranks the sample. Applying Lemma 8 gives us that  $r(X_{(i+1)}, X_{(i)}) = 1$  for all  $i \in \{1 \dots n\}$ . Now, let  $\{h_i\}_{i=1}^{n+1}$  be the sequence of classifiers defined by  $h_i(x) = \mathbb{1}\{r(x, X_{(i)}) \geq 0\}$ . Since  $r \in \mathcal{R}_{C,N}$  is a convex ranking of degree  $N$ , all the classifiers are of the form  $h_i(x) = \sum_{k=1}^N \mathbb{1}\{l_{i,k} \leq x \leq u_{i,k}\}$  and since  $r$  is a continuous ranking and so transitive (see Lemma 8),  $h_1 \geq h_2 \geq \dots \geq h_{n+1}$ .

( $\Leftarrow$ ) Assume that there exists a sequence of classifiers  $\{h_i\}_{i=1}^{n+1}$  of the form  $h_i(x) = \sum_{k=1}^N \mathbb{1}\{l_{i,k} \leq x \leq u_{i,k}\}$  satisfying: (i)  $h_1 \geq h_2 \geq \dots \geq h_{n+1}$  and (ii)  $h_i(X_{(j)}) = \mathbb{1}\{(j) \geq i\}$  for all  $(i, j) \in \{1 \dots n+1\}^2$ . Let  $f'_\epsilon = \sum_{i=1}^{n+1} \sum_{k=1}^N \phi_\epsilon(x, l_{i,k}, u_{i,k})$  be an approximation of the function  $f(x) = \sum_{i=1}^{n+1} h_i(x)$ , for which  $L_{n+1}(r_{f'}) = 0$ , where

$$\phi_\epsilon(x, l, u) = \left(1 - \frac{l-x}{\epsilon}\right) \cdot \mathbb{1}\{l-\epsilon \leq x < l\} + \mathbb{1}\{l \leq x \leq u\} + \mathbb{1}\{u < x \leq u+\epsilon\} \cdot \left(1 - \frac{x-u}{\epsilon}\right)$$

is an approximation of the function  $x \mapsto \mathbb{1}\{l \leq x \leq u\}$ . Since the functions  $\phi_\epsilon(\cdot, l, u)$  are continuous, it also implies that their sum,  $f'_\epsilon$ , is continuous. Now, note that  $f'_\epsilon(x) = f(x) + er_\epsilon(x)$  where  $er_\epsilon(x) = \sum_{i=1}^{n+1} \sum_{k=1}^N (1 - (l_{i,k} - x)/\epsilon) \mathbb{1}\{x \in [l_{i,k} - \epsilon, l_{i,k}]\} + (1 - (x - u_{i,k})/\epsilon) \mathbb{1}\{x \in [u_{i,k}, u_{i,k} + \epsilon]\}$ . For any  $\epsilon < \epsilon_1 = \min\{|x_1 - x_2| : x_1 \neq x_2 \in \{X_{(i)}\}_{i=1}^{n+1} \cup \{l_{i,k}\}_{i=1 \dots n+1}^{k=1 \dots N} \cup \{u_{i,k}\}_{i=1 \dots n+1}^{k=1 \dots N}\}$  small enough and any  $i \in \{1 \dots n+1\}$ , we have that  $er_\epsilon(X_{(i)}) = 0$ . We deduce that  $L_{n+1}(r_{f'_\epsilon}) = L_{n+1}(r_f) = 0$  whenever  $\epsilon < \epsilon_1$ . Using the same decomposition, one can easily show that for any  $\epsilon < \epsilon_2 = \min\{|x_1 - x_2| : x_1 \neq x_2 \in \{l_{i,k}\}_{i=1 \dots n+1}^{k=1 \dots N} \cup \{u_{i,k}\}_{i=1 \dots n+1}^{k=1 \dots N}\}/2$  all the level sets of  $f'_\epsilon$  are a union of at most  $N$  segments (convex sets). Putting previous statements altogether and denoting  $\epsilon^* = \min(\epsilon_1, \epsilon_2)/2$ , gives us that  $r_{f'_{\epsilon^*}} \in \mathcal{R}_{C,N}$  and  $L_{n+1}(r_{f'_{\epsilon^*}}) = 0$ .  $\square$

**Proof of Proposition 8.** Fix any  $d \in \mathbb{N}^*$ , let  $N = 1$ , and let  $\{(X_i, f(X_i))\}_{i=1}^n$  be any sample satisfying  $f(X_{(1)}) < f(X_{(2)}) < \dots < f(X_{(n+1)})$ .

( $\Rightarrow$ ) Assume that  $\min_{r \in \mathcal{R}_{C,1}} L_{n+1}(r) = 0$  and let  $r \in \mathcal{R}_{C,1}$  be any ranking that perfectly ranks the sample. Since  $r$  perfectly ranks the sample, for any  $k \in \{1 \dots n+1\}$ ,  $r(X_{(j)}, X_{(k)}) = 2\mathbb{1}\{(j) > (k)\} - 1 \forall j \neq k$  and since  $r$  is a convex ranking, the set  $\{x \in \mathcal{X} : r(x, X_{(k)})\}$  is a convex set. Now, fix any  $k \in \{1 \dots n\}$ . Using the previous statements, we get that  $\{X_{(i)}\}_{i=k+1}^{n+1} \in \{x \in \mathcal{X} : r(x, X_{(k+1)}) \geq 0\}$  and  $X_{(k)} \notin \{x \in \mathcal{X} : r(x, X_{(k+1)}) \geq 0\}$ . Since  $\text{CH}\{X_{(i)}\}_{i=k+1}^{n+1}$  is the smallest convex set that contains  $\{X_{(i)}\}_{i=k+1}^{n+1}$  and since  $\{x \in \mathcal{X} : r(x, X_{(k+1)}) \geq 0\}$  is also a convex set that contains  $\{X_{(i)}\}_{i=k+1}^{n+1}$ , necessarily  $\text{CH}\{X_{(i)}\}_{i=k+1}^{n+1} \subseteq \{x \in \mathcal{X} : r(x, X_{(k+1)}) \geq 0\}$ . Combining the previous statements gives us that  $X_{(k)} \notin \text{CH}\{X_{(i)}\}_{i=k+1}^{n+1}$ . Therefore, using the definition of convex hull, we know that there does not exist any  $(\lambda_1 \dots \lambda_k) \in \mathbb{R}^k$  such that  $\sum_{i=1}^k \lambda_i X_{(n+2-i)} = X_{(n+1-k)}$ ,  $\sum_{i=1}^k \lambda_i = 1$  and  $\lambda_i \geq 0$ . Rewriting this constraint in a matricial form gives us that the polyhedron

$$\{\lambda \in \mathbb{R}^k : M_k \lambda^T = X_{(n+1-k)}^T, \langle \vec{1}, \lambda \rangle = 1, \lambda \succeq \vec{0}\}$$

where  $M_k$  is the  $(d, k)$ -matrix where its  $i$ -th column is equal to  $X_{(n+2-i)}^T$ , is empty.

( $\Leftarrow$ ) Assume that the cascade of polyhedrons is empty. Reproducing the (inverse) same steps as in the first equivalence of the proof, we get that  $X_{(k)} \notin \text{CH}\{X_{(i)}\}_{i=k+1}^{n+1}$  for any  $k \in \{1 \dots n\}$ . Therefore the convex hulls form a nested sequence  $\text{CH}\{X_{(n+1)}\} \subset \text{CH}\{X_{(i)}\}_{i=n}^{n+1} \subset \dots \subset \text{CH}\{X_{(i)}\}_{i=1}^{n+1}$ . Now, let  $f'_\epsilon(x) = \sum_{i=1}^{n+1} \phi_{\epsilon,i}(x)$  be an approximation of the function  $f(x) = \sum_{i=1}^{n+1} \mathbb{1}\{x \in \text{CH}\{X_{(j)}\}_{j=i}^{n+1}\}$ , for which  $L_{n+1}(r) = 0$ , where for any  $i \in \{1 \dots n+1\}$

$$\phi_{\epsilon,i}(x) = \begin{cases} 1 - d(x, B(\text{CH}\{X_{(j)}\}_{j=i}^{n+1}, 2(n+1-i)\epsilon))/\epsilon & \text{if } d(x, B(\text{CH}\{X_{(j)}\}_{j=i}^{n+1}, 2(n+1-i)\epsilon)) \leq \epsilon \\ 0 & \text{otherwise.} \end{cases}$$

is an approximation of the function  $x \mapsto \mathbb{1}\{x \in \text{CH}\{X_{(j)}\}_{j=i}^{n+1}\}$ . For any convex set  $\mathcal{X}$ , the function  $x \mapsto d(x, \mathcal{X})$  is continuous. we deduce that the functions  $\{\phi_{\epsilon,i}\}_{i=1}^{n+1}$  are continuous and so is their sum  $f'_\epsilon$ . First, using the same decomposition as in the proof of Proposition 7, one can show that  $L_{n+1}(r_{f'_\epsilon}) = L_{n+1}(r_f) = 0$  for any  $\epsilon < \epsilon^* = \min_{i=1 \dots n} d(X_{(i)}, \text{CH}\{X_{(j)}\}_{j=i+1}^{n+1})/(2n+2)$  small enough. Secondly, using the fact that for any convex set  $\mathcal{X} \subset \mathbb{R}^d$ , its  $\epsilon$ -Ball  $B(\mathcal{X}, \epsilon)$  is also a convex set (see Lemma 6), for any  $\epsilon < \epsilon^*$  and any  $x' \in \mathcal{X}$ , we have that the level set  $\{x \in \mathcal{X} : f_\epsilon(x) \geq f_\epsilon(x')\}$  is a convex set. Putting the previous statements altogether gives us that  $r_{f'_\epsilon} \in \mathcal{R}_{C,1}$  and  $L_{n+1}(r_{f'_\epsilon}) = 0$ .  $\square$

## References

- Boucheron, Stéphane, Lugosi, Gábor, and Massart, Pascal. *Concentration inequalities: A nonasymptotic theory of independence*. OUP Oxford, 2013.
- Cléménçon, Stéphan, Lugosi, Gabor, and Vayatis, Nicolas. Ranking and empirical minimization of u-statistics. *The Annals of Statistics*, pp. 844–874, 2010.
- Zabinsky, Zeldá B and Smith, Robert L. Pure adaptive search in global optimization. *Mathematical Programming*, 53 (1-3):323–338, 1992.
